# Supplementary material
Source: PubMed Central journal article supplement (PMC4197533)
Supplement: supp_141.16.3134_DEV110395.pdf [file supp_141.16.3134_DEV110395.pdf]

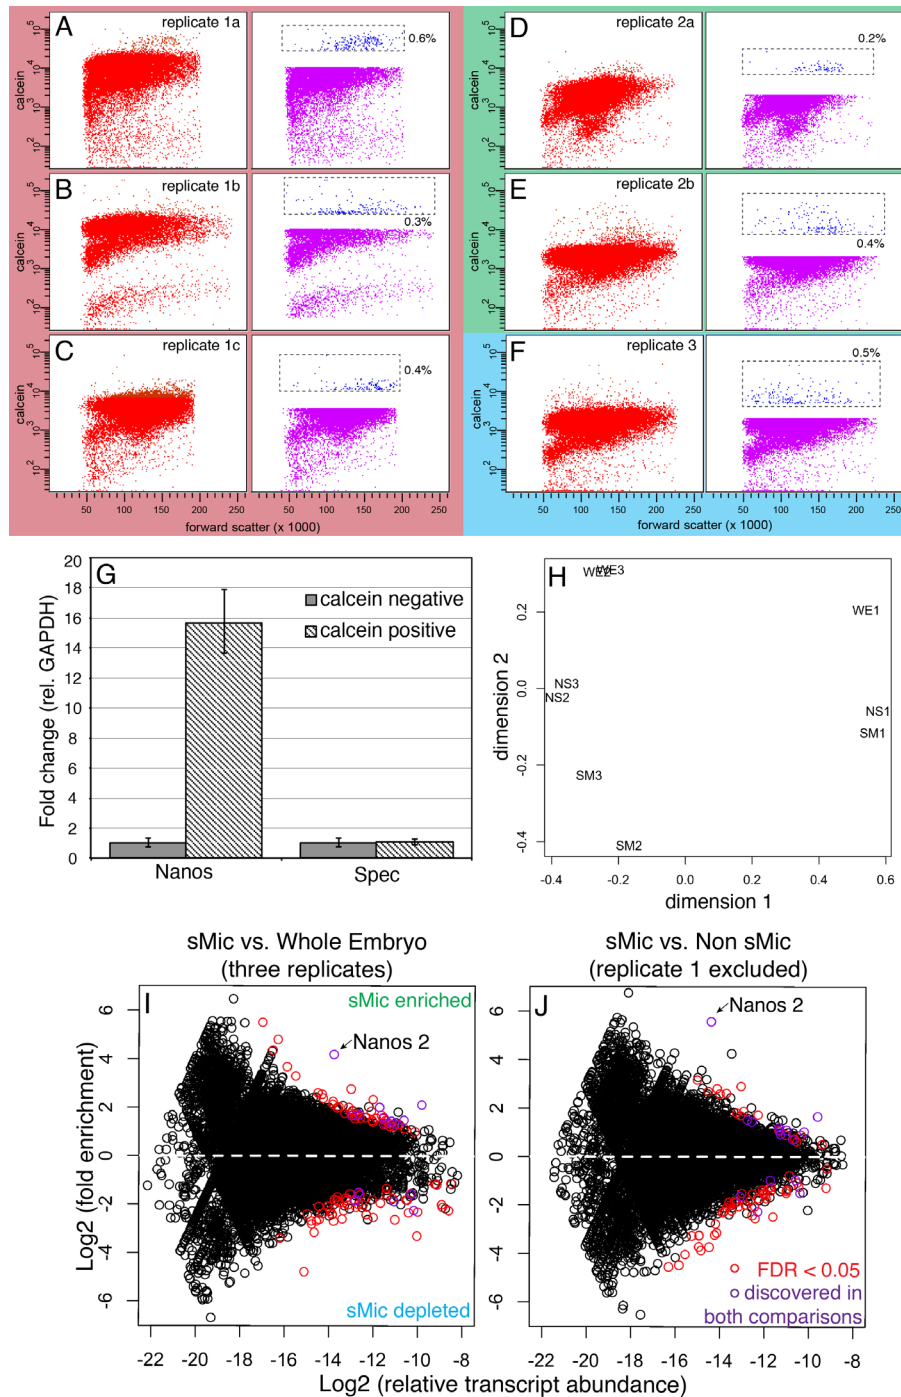

**Figure S1, related to Figures 1.** FACS isolation of sMics and transcriptomic analysis. (A-F) Scatter plot representations of FACS sorts for three biological replicates. Replicate 1 (A-C, red background) consisted of three sorts of embryos derived from distinct parental crosses. Replicate 2 (D-E, green background) consisted of two sorts from two parental crosses. Replicate 3 (F, blue background) was sorted from a single parental cross. Red points indicate the total cell population, blue points indicate the collected calcein+ cells, and purple points indicate collected calcein- cells. Percentages represent fraction of collected calcein+ cells relative to the whole population. (G) qPCR for Nanos indicates enrichment of sMics in the calcein+ fraction, as opposed for Spec, an ectodermal negative control. (H) Multidimensional scaling (MDS) analysis of replicate transcriptomes for isolated sMics (SM1-3), non-sMics (NS1-3), and whole embryo (WE1-3). Replicate 2 and 3 samples were highly related with whole embryo, sMic, and non-sMic transcriptomes clustering separately. Replicate 1 samples are outliers, showing low relatedness to the others in both dimensions, and poor separation between SM and NS samples. This variation likely points to issues with sample handling (RNA collection, or RNA-seq sample preparation) or less efficient calcein labeling. In subsequent differential expression analysis, we therefore made comparisons both with and without including Replicate 1 samples. (I,J) Smear plot depiction of differentially expressed genes. (I) sMic vs. Whole Embryo with replicate 1 included, and (J) sMic vs. non-sMic with replicate 1 excluded are considered here. Transcripts are represented by open circles, with fold enrichment in the sMics on the y-axis and relative transcript abundance on the x-axis. Transcripts meeting a significance threshold of 0.05 (false discovery rate, FDR) are in red; transcripts identified in both comparisons are in purple. Arrows indicate the previously identified sMic factor Nanos2.

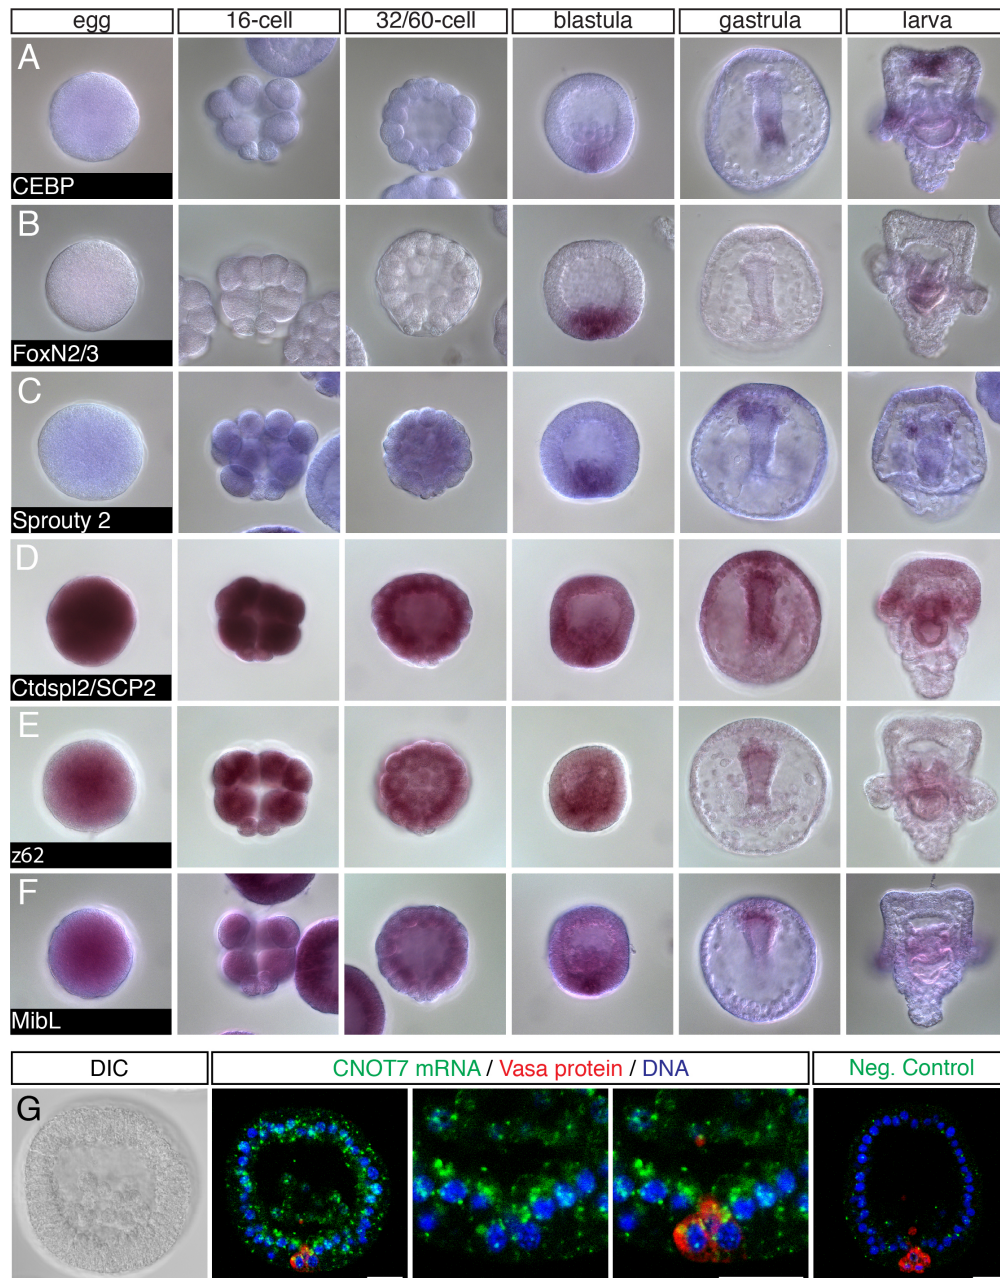

**Figure S2, related to Figures 1 and 3.** WMISH for selected transcripts. (A-F) WMISH for sMic-enriched transcripts identified through differential expression analysis. (G) The *S. purpuratus* genome contains two CNOT-related nucleases: CNOT6 and CNOT7. Unlike CNOT6, which is specifically depleted in the sMics, CNOT7 transcript (green) is ubiquitously distributed. sMics are labeled in red with vasa antibody.



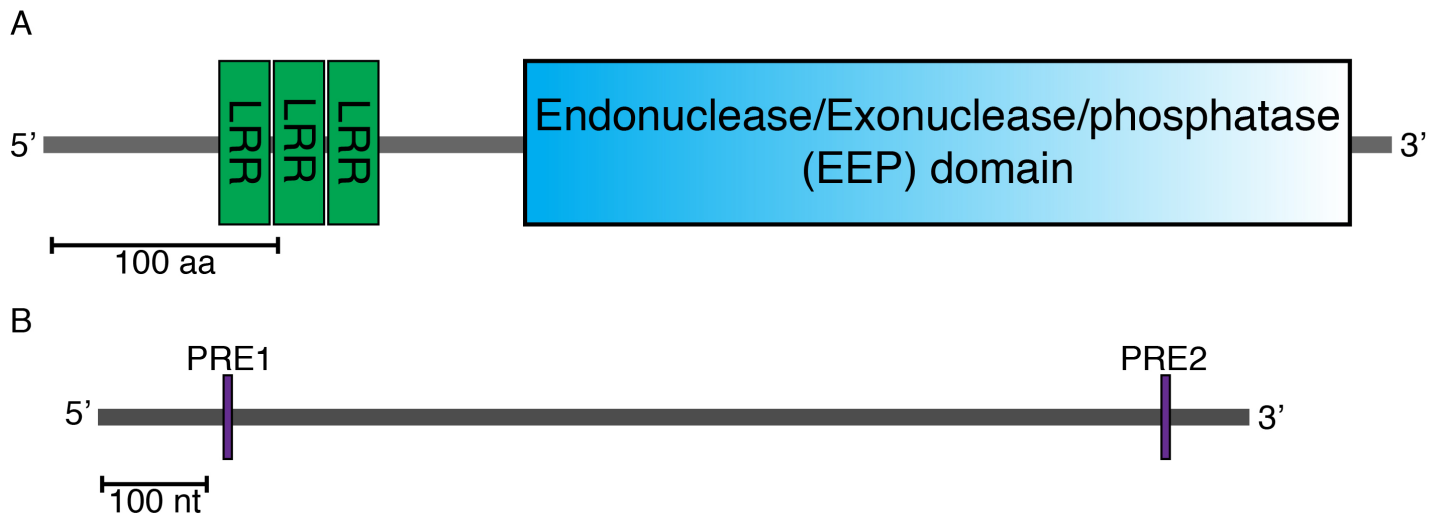

**Figure S3, related to Figure 4.** Organization of the CNOT6 open reading frame and 3'UTR. (A) Domain organization of CNOT6 predicted by PFAM (Punta et al., 2012). (B) Schematic of PRE motifs within the CNOT6 3'UTR and full-length sequence.

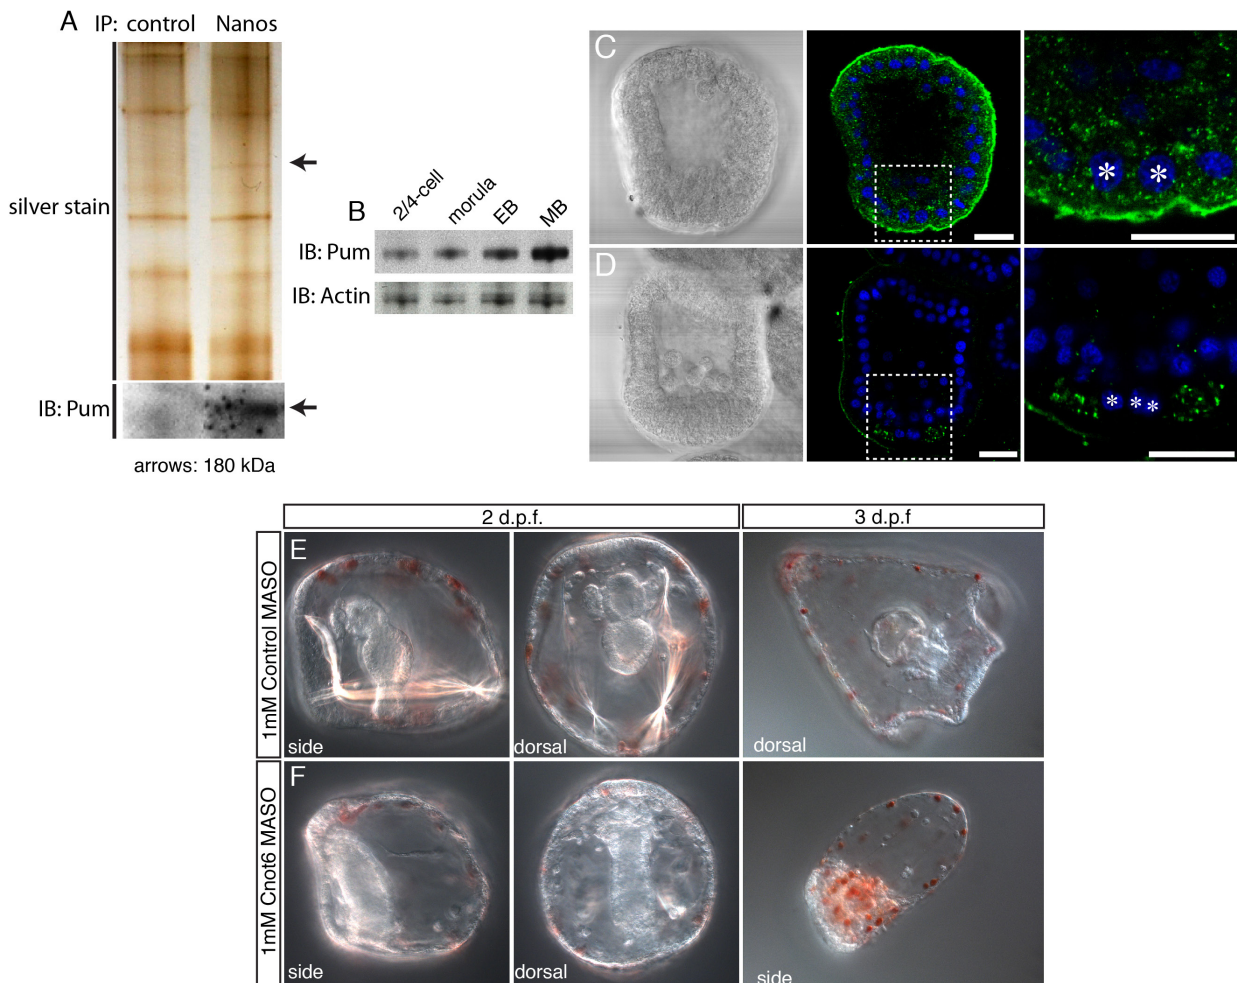

**Figure S4, related to Figure 3 and 4.** (A) Association of Nanos and Pumilio. Compared to Vasa antibody control, Nanos antibody specifically pulls down a 180 kDa band recognized by silver stain and Pumilio immunoblot. (B) Temporal expression of Pumilio. Pumilio is detectable in early embryos, and increases in abundance through early blastulae (EB) and mesenchyme blastulae (MB) stages. (C,D) Spatial localization of Pumilio protein. Pumilio is detectable in granule structures in all cells, including the sMics, of early blastula (C), but becomes highly enriched in the Veg2 mesodermal precursors after primary mesenchyme ingress (D). Asterisks indicate sMic nuclei. (E,F) Injection of 1mM CNOT6 MASO 1 results in failure to produce skeletons or a tripartite gut. By 3 days, the endoderm degenerates into mesenchyme-like cells.

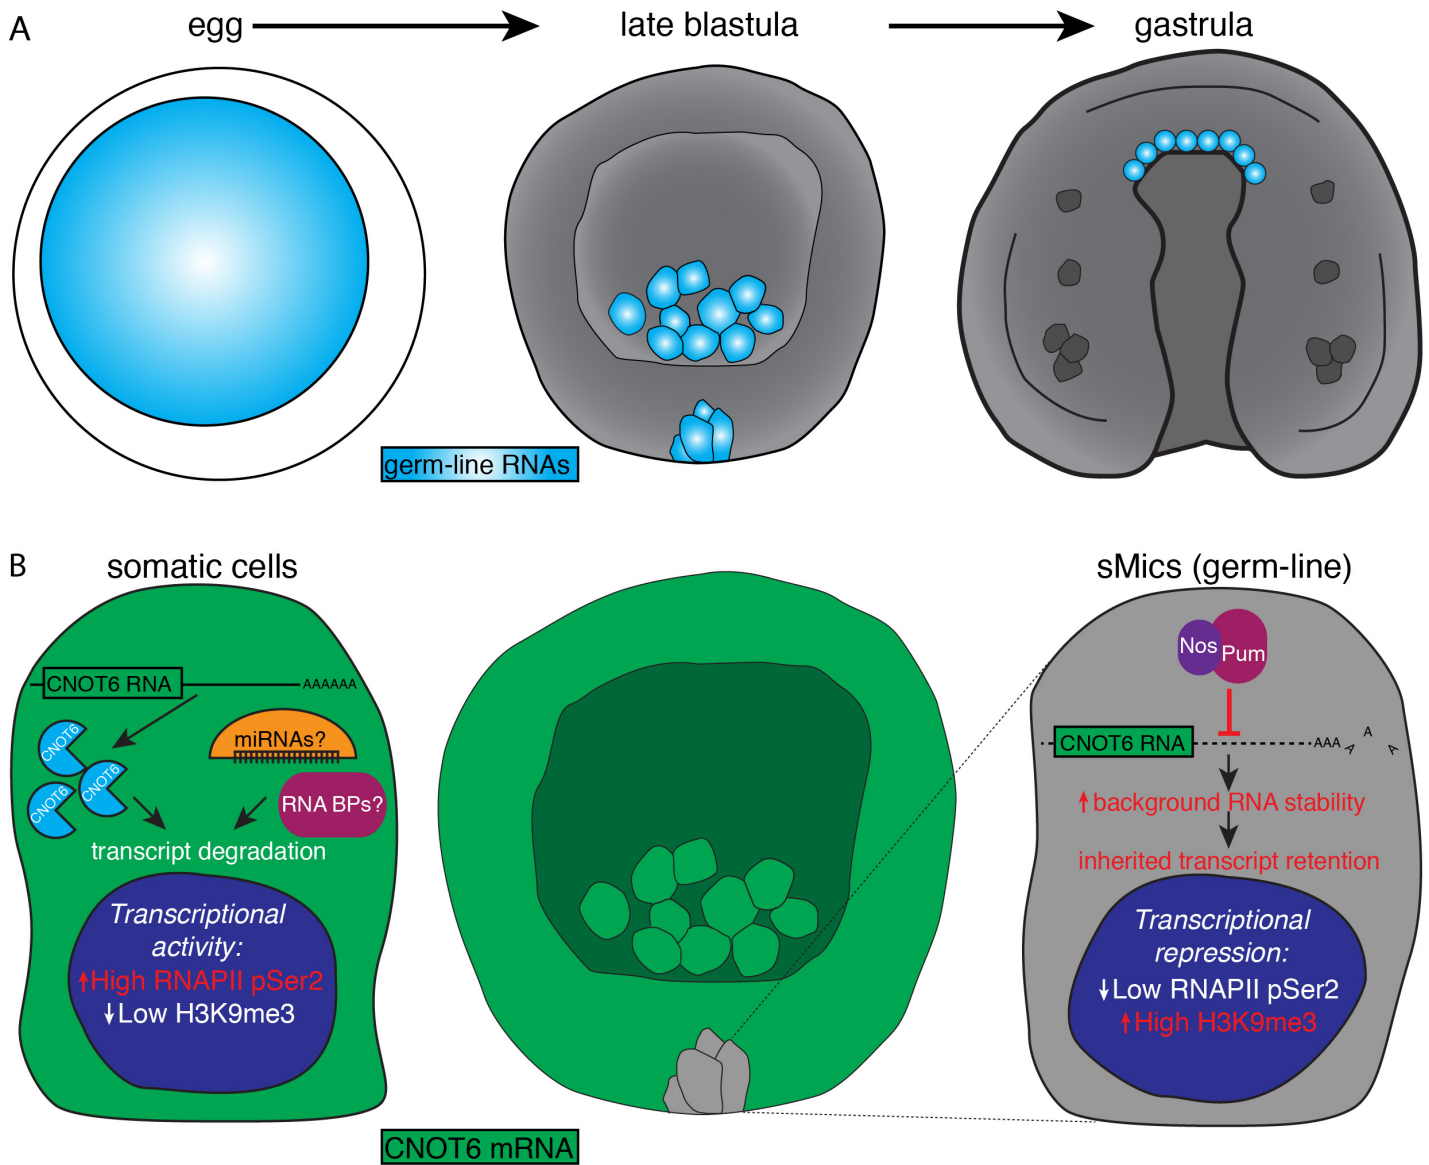

**Figure S5. Model. Time capsule model for germ line development.** (A) Maternally deposited mRNAs are coordinately degraded in somatic cells at blastula/gastrula stage but stabilized in the sMics. (B) Mechanism for sMic segregation. CNOT6 transcript is in green, and is present in all cells except sMics (gray), where Nanos/Pumilio (Nos/Pum) represses it. This repression creates a stable environment for inherited RNA. Conversely, CNOT6 protein accumulates in somatic cells, where it may act in parallel with and/or downstream of miRNA and RNA binding protein (BP) mediated degradation.

### Supplementary References

Punta, M., Coghill, P. C., Eberhardt, R. Y., Mistry, J., Tate, J., Boursnell, C., Pang, N., Forslund, K., Ceric, G., Clements, J., et al. (2012). The Pfam protein families database. *Nucleic Acids Res* **40**, D290–301.



**Table S1, related to Figure 1.** Gene set enrichment analysis of the union sets of 78 sMic enriched transcripts, and 152 sMic-depleted transcripts. Analysis was performed using the topGO Bioconductor package. *P*-values are by Fisher's exact test.

| sMic-enriched categories |                                             |          | sMic-depleted categories |                                             |          |
|--------------------------|---------------------------------------------|----------|--------------------------|---------------------------------------------|----------|
| GO ID                    | Term                                        | p-val    | GO ID                    | Term                                        | p-val    |
| 0003676                  | nucleic acid binding                        | 4.40E-05 | 0005198                  | structural molecule activity                | 4.50E-08 |
| 0000988                  | protein binding transcription factor act... | 0.0015   | 0032561                  | guanyl ribonucleotide binding               | 0.0042   |
| 0000989                  | transcription factor binding transcripti... | 0.0015   | 0019001                  | guanyl nucleotide binding                   | 0.0045   |
| 0003712                  | transcription cofactor activity             | 0.0015   | 0005201                  | extracellular matrix structural constitu... | 0.0053   |
| 0043565                  | sequence-specific DNA binding               | 0.0049   | 0015399                  | primary active transmembrane transporter... | 0.01     |
| 0008134                  | transcription factor binding                | 0.006    | 0015405                  | P-P-bond-hydrolysis-driven transmembrane... | 0.01     |
| 0008349                  | MAP kinase kinase kinase activity           | 0.0067   | 0004683                  | calmodulin-dependent protein kinase acti... | 0.016    |
| 0043425                  | bHLH transcription factor binding           | 0.0067   | 0004197                  | cysteine-type endopeptidase activity        | 0.0212   |
| 0043426                  | MRF binding                                 | 0.0067   | 0022804                  | active transmembrane transporter activit... | 0.0228   |
| 0005488                  | binding                                     | 0.0086   | 0004674                  | protein serine/threonine kinase activity    | 0.0237   |
| 0035258                  | steroid hormone receptor binding            | 0.0178   | 0003723                  | RNA binding                                 | 0.0287   |
| 0003729                  | mRNA binding                                | 0.0189   | 0016289                  | CoA hydrolase activity                      | 0.0368   |
| 0035257                  | nuclear hormone receptor binding            | 0.0224   | 0050839                  | cell adhesion molecule binding              | 0.0368   |
| 0051427                  | hormone receptor binding                    | 0.0275   |                          |                                             |          |
| 0090079                  | translation regulator activity, nucleic ... | 0.0328   |                          |                                             |          |
| 0003677                  | DNA binding                                 | 0.0389   |                          |                                             |          |
| 0042974                  | retinoic acid receptor binding              | 0.0393   |                          |                                             |          |
| 0045182                  | translation regulator activity              | 0.0393   |                          |                                             |          |
| 0008092                  | cytoskeletal protein binding                | 0.0433   |                          |                                             |          |
| 0032561                  | guanyl ribonucleotide binding               | 0.0446   |                          |                                             |          |
| 0046332                  | SMAD binding                                | 0.0457   |                          |                                             |          |
| 0019001                  | guanyl nucleotide binding                   | 0.0467   |                          |                                             |          |

**Table S2.** Summary of FACS replicates and RNA extraction yields.

|                                                          | <b>sMic</b>                  | <b>non-sMic</b>              | <b>whole embryo</b> |
|----------------------------------------------------------|------------------------------|------------------------------|---------------------|
| <b>Replicate 1</b><br><i>(3 pooled parental crosses)</i> | 700 ng RNA<br>113,191 cells  | 1800 ng RNA<br>618,511 cells | 3800 ng RNA         |
| <b>Replicate 2</b><br><i>(2 pooled parental crosses)</i> | 1080 ng RNA<br>213,174 cells | 1820 ng RNA<br>892,329 cells | 6700 ng RNA         |
| <b>Replicate 3</b><br><i>(1 parental cross)</i>          | 350 ng RNA<br>55,571 cells   | 1278 ng RNA<br>438,938 cells | 1508 ng RNA         |

**Table S3.** Helicos run statistics.

| <b>Sample Name</b> | <b>Total Filtered Reads</b> | <b>Mean Read Length (nt)</b> | <b>Percent aligned reads</b> | <b>Sequencing Error Rate</b> |
|--------------------|-----------------------------|------------------------------|------------------------------|------------------------------|
| WE1                | 27,035,746                  | 31.21                        | 49.08%                       | 6.95%                        |
| SMM1               | 25,331,121                  | 31.15                        | 44.29%                       | 6.86%                        |
| NSM1               | 30,889,594                  | 31.27                        | 42.25%                       | 7.02%                        |
| WE2                | 14,670,195                  | 33.75                        | 60.12%                       | 5.44%                        |
| SMM2               | 15,096,355                  | 33.28                        | 60.84%                       | 5.49%                        |
| NSM2               | 12,043,418                  | 34.24                        | 57.30%                       | 5.63%                        |
| WE3                | 14,450,706                  | 33.84                        | 54.68%                       | 5.89%                        |
| SMM3               | 8,300,956                   | 33.66                        | 56.06%                       | 5.62%                        |
| NSM3               | 10,630,234                  | 34.15                        | 58.47%                       | 5.69%                        |



**Table S4.** Primers used for generation of template DNA for ISH probe transcription.

| Primer Name  | Sequence                                                               |
|--------------|------------------------------------------------------------------------|
| Baf250       | F: TCGACAACCACCACTACCAA<br>R: taatacgactcactatagggTGTTGTTCACTCCACCCGTA |
| CEBP         | F: AGGGCTGAGGTACAGCAGAA<br>R: taatacgactcactatagggCCCTCGACACGTTTCTTTA  |
| FoxN2/3      | F: CGAATGGACAAAGGACCACT<br>R: taatacgactcactatagggCTTGTTGATGGGGTACACT  |
| Sprouty2     | F: GCTCTGTTCCCTTGAGCAAC<br>R: taatacgactcactatagggGCAGGGATCATCCGTACAGT |
| Ctdspl2/SCP2 | F: AAGCCACCAATCCTGTGTT<br>R: taatacgactcactatagggCAGAAAGGCACAAGCAATCA  |
| z62          | F: AGTCTAGCAAATGGCGTCGT<br>R: taatacgactcactatagggATGTAACCACATTTCGAGCA |
| MibL         | F: CTGGACAGACACCAGAGCAA<br>R: taatacgactcactatagggCATCTGCTCCGTGCATAAGA |
| CNOT6        | F: GCAGGTGCTAGGTCTGAAGG<br>R: taatacgactcactatagggCGAGTTGGAGGAGAAGTTGC |
| CNOT7        | F: TGCCAACCTCAAACCAATGAA<br>R: taatacgactcactatagggGCACCCTGGTAAAAGGTCA |

**Table S5.** Primers used for CNOT6 reporter constructions.

| <b>Primer Name (description)</b> | <b>Sequence</b>                                                                                        |
|----------------------------------|--------------------------------------------------------------------------------------------------------|
| CNOT6 3'UTR (reporter construct) | <b>F:</b> GGGACTCAGGGTGGTGTTTC<br><b>R:</b> ACAGAGAATTGCACATTGGTTGG                                    |
| PRE1 (site-directed mutagenesis) | <b>F:</b> TTCGTACTTTGTACAGTGaaaAAATTGATGCTATTTTGC<br><b>R:</b> GCAAAATAGCATCAATTTtttCACTGTACAAAGTACGAA |
| PRE2 (site-directed mutagenesis) | <b>F:</b> ATTTGAGACCATGGGTTGaaaAAATGAGGATTTGAACCA<br><b>R:</b> TGGTCAAATCCTCATTtttCAACCCATGGTCTCAAAT   |

**Table S6.** Custom morpholino sequences used.

| <b>MASO Name</b> | <b>Sequence</b>           | <b>Concentration of injection solution</b> |
|------------------|---------------------------|--------------------------------------------|
| Nanos            | GTGACTAAAGTGCGTGGAAACTCGA | 500 $\mu$ M                                |
| Pumilio          | TTTCCTTCTATGATACAGACCCGCT | 100 $\mu$ M                                |
| CNOT6 1          | ATTTATCTTTGGGCATCCTGGTGGC | 500 $\mu$ M                                |
| CNOT6 2          | GTCGGTTTTACACAGTTCAGGAGGC | 500 $\mu$ M                                |
| PRE1             | AATAGCATCAATTTACACACTGTAC | 1000 $\mu$ M                               |
| PRE2             | GTTCAAATCCTCATTTACACAACCC | 1000 $\mu$ M                               |

**Table S7.**

[Download Table S7](#)

**Table S8.**

[Download Table S8](#)

**Table S9.**

[Download Table S9](#)
